# Supplementary material
Source: PubMed Central journal article supplement (PMC3870188)
Supplement: NIHMS443775-supplement-Suppl_Data.pdf [file NIHMS443775-supplement-Suppl_Data.pdf]

# The Helical Alanine Controversy: An (Ala)<sub>6</sub> Insertion Increases Helicity Dramatically

Jasper C. Lin, Bipasha Barua, Niels H. Andersen

Department of Chemistry, University of Washington, Seattle WA 98195

## SUPPORTING INFORMATION

For our Trp-cage thermodynamic analyses, the melting temperature ( $T_m$ ) is defined as the temperature at which the peptide is 50% folded. Oftentimes, the more stable Trp-cage analogs had  $T_m$ 's higher than 325 K, the highest temperature at which we normally run NMR experiments. To determine the  $T_m$  thus requires an extrapolation from the two highest temperature points in order to determine the 50% folded temperature. This process is less than ideal, especially in those cases where the extrapolation is relatively large. Alternatively, we calculated the temperature at which the peptide is 70% folded ( $T_{70\%}$ ). This point lies within the relatively linear region of the melting profile. Also, all of the peptides are 30% unfolded at temperatures less than 325 K. Therefore,  $T_{70\%}$  was always an interpolation within the linear region of the melting curves.

In our previous NMR melting studies of Trp-cage species, the slopes of the  $f_F$  versus  $T$  plots for diverse species with  $T_m$ 's spanning from 20° to 65°C are parallel in the  $f_F = 0.70 - 0.20$  range. This implies that there should be a near constant value for  $(T_m - T_{70\%})$  and a nearly linear relationship between melting points and  $\Delta G_U$ . Figures S1 – S2 show the correlations between the two melting measures and  $\Delta G_U$ . It would appear that a general rule of 0.34 kJ/mol fold stability change for a 1 °C change in melting temperature is applicable for these systems. From the correlations shown in Figure S1, the  $\Delta G_U$  of TC11b1, which could not be determined using H/D exchange experiments, is calculated from the  $T_m$ .

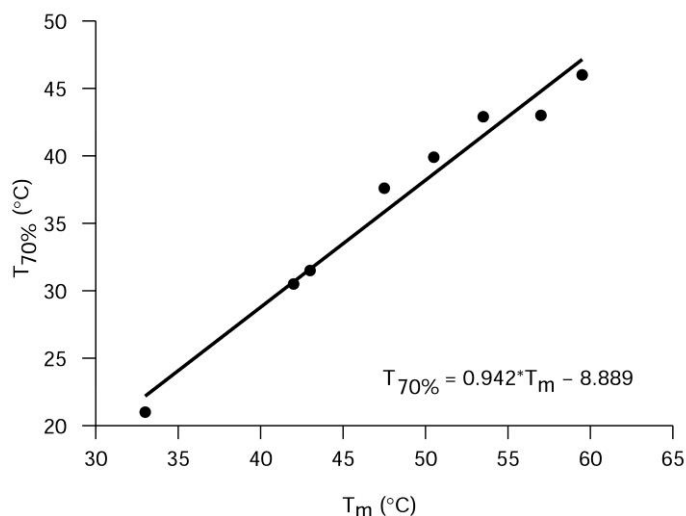

Figure S1. Correlation between  $T_m$  and  $T_{70\%}$ . A slope of  $\sim 1$  demonstrates a constant difference between  $T_m$  and  $T_{70\%}$ .

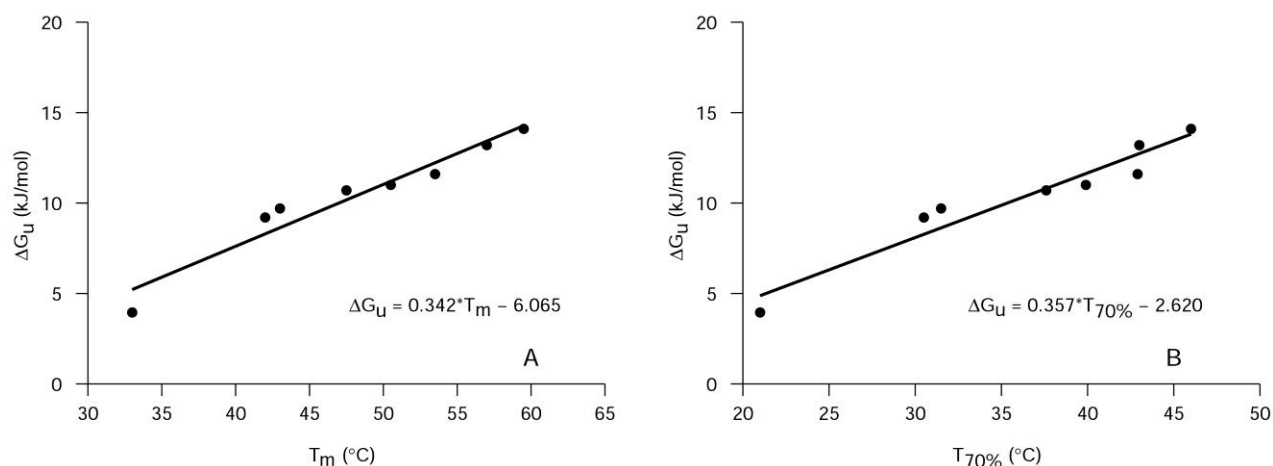

Figure S2. Correlation between  $\Delta G_U$  and  $T_m$  (A) or  $T_{70\%}$  (B).

Almost all of the  $\Delta G_U$  data in Figure S2 was computed using protection factors. Only one point, TC12b ( $\Delta G_U = 4.0$  kJ/mol), was calculated from CSD data. Ignoring the TC12b point, predicts a 0.26 kJ/mol stability change per 1 °C change in melting temperature:  $\Delta G_U = 0.26 \cdot (T_m - 1.75)$ . Only one point in Figure 5 relies on this correlation, excluding that point, or revising it based on  $\Delta G_U = 0.26 \cdot (T_m - 1.75)$ , lowers the alanine propagation value estimate to 1.59 (or 1.51), still well above the Scheraga and Kemp values of 1.03 – 1.15.

We can also derive an alanine propagation value directly from a plot of  $T_{70\%}$  versus  $x$  for the TC11bx series of peptides (Figure S3). The slope for this correlation is 3.18°C/Ala-insertion. Based on the calibration line in panel B of Figure S2 this yields  $w_{Ala} = 1.62$ , exactly the same value as obtained by the correlation in Figure 5.

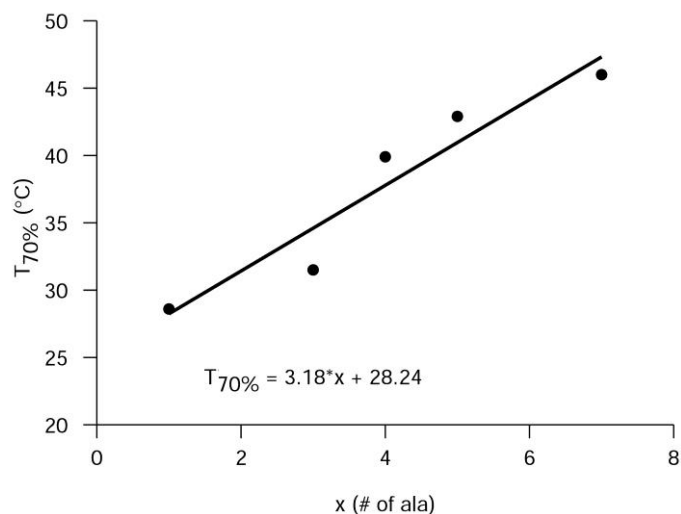

Figure S3. Increase of  $T_{70\%}$  upon addition of alanine residues. The slope represents the  $\Delta T_{70\%}$  per alanine and can be used to calculate the  $\Delta \Delta G_U$  per alanine.
